# Supplementary material
Source: PubMed Central journal article supplement (PMC3285145)

## **Supplemental Information**

### **The Selection of Monoclonal Antibodies Against 6-oxo-M<sub>1</sub>dG and Their Use in an LC-MS/MS Assay for the Presence of 6-oxo-M<sub>1</sub>dG *in Vivo***

Dapo Akingbade<sup>1-3</sup>, Philip J. Kingsley<sup>1-3</sup>, Sarah C. Shuck<sup>1,2</sup>, Tracy Cooper<sup>4</sup>, Robert Carnahan<sup>4</sup>, Jozef Szekely<sup>1,2</sup>, and Lawrence J. Marnett<sup>1-3\*</sup>

Departments of <sup>1</sup>Biochemistry, <sup>2</sup>Chemistry, and <sup>3</sup>Pharmacology, Vanderbilt Institute of Chemical Biology, <sup>4</sup>Vanderbilt Antibody and Protein Resource Core, Center for Molecular Toxicology, and Vanderbilt-Ingram Comprehensive Cancer Center  
Vanderbilt University School of Medicine, Nashville, Tennessee 37232-0146, United States

^These authors contributed equally to the manuscript

\*Corresponding author

telephone: (615) 343-7329

fax: (615) 343-7534

email: [larry.marnett@Vanderbilt.Edu](mailto:larry.marnett@Vanderbilt.Edu)

## Supplemental Figure A. Proton NMR of 6-oxo-M<sub>1</sub>Guo

6-oxo-M<sub>1</sub>Guo was synthesized as described in Materials and Methods. The purified product was analyzed using proton NMR. The proton assignment is displayed in the structure of 6-oxo-M<sub>1</sub>Guo.

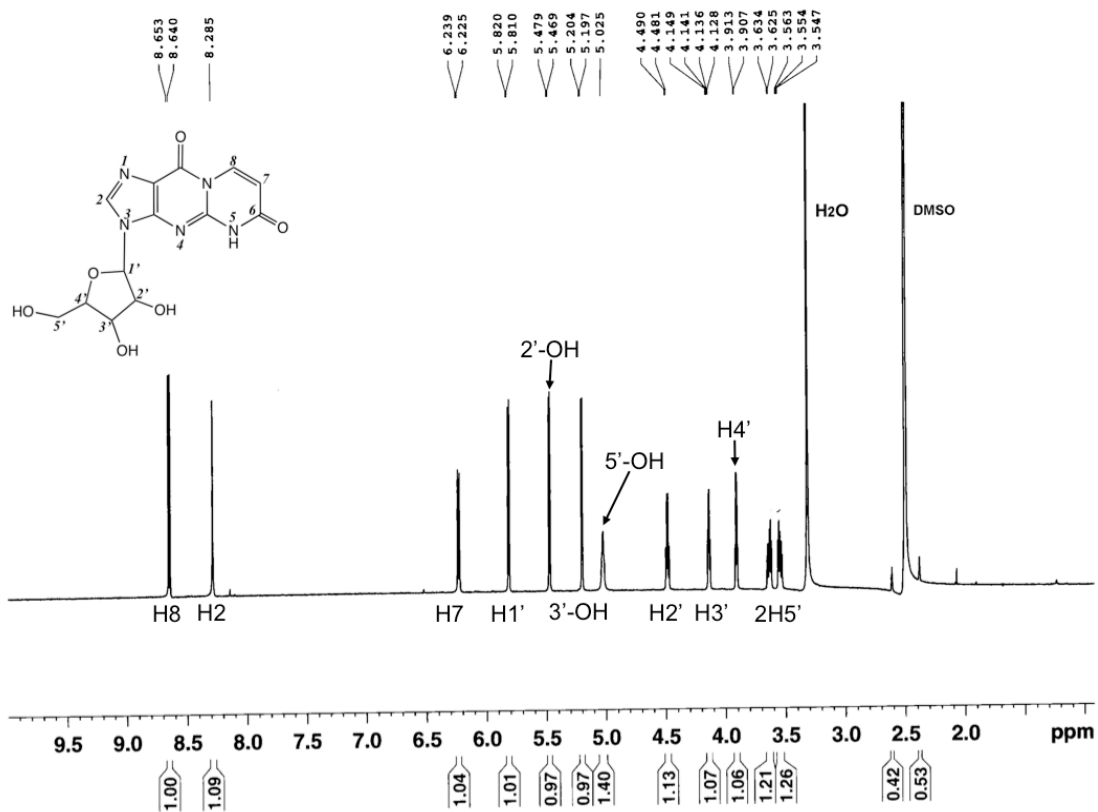

## Supplemental Figure B. Scheme of the generation of the 6-oxo-M<sub>1</sub>Guo/protein conjugate.

6-oxo-M<sub>1</sub>Guo is conjugated to either BSA or KLH as described in the Materials and Methods section, resulting in a pure protein conjugate suitable for murine inoculation or use in ELISA analysis.

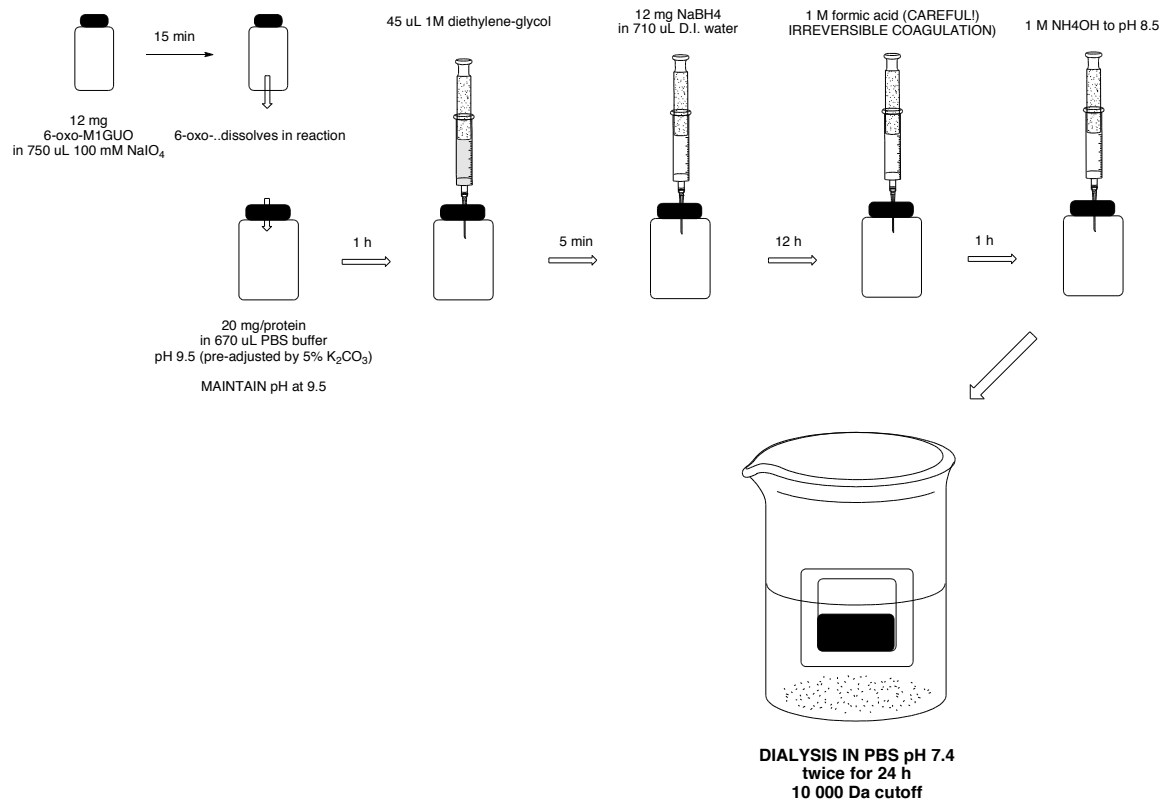

### Supplemental Figure C. Sera Reactivity with 6-oxo-M<sub>1</sub>dG

The reactivity of diluted sera (1:5000) in the presence of non-BSA bound 6-oxo-M<sub>1</sub>dG was analyzed using competitive ELISA analysis. Optical density readings were taken 15 and 30 minutes after adding ABTS substrate and averaged. Sera and antigen were co-incubated with multiple concentrations of non-BSA bound 6-oxo-M<sub>1</sub>dG as indicated for 60 minutes.

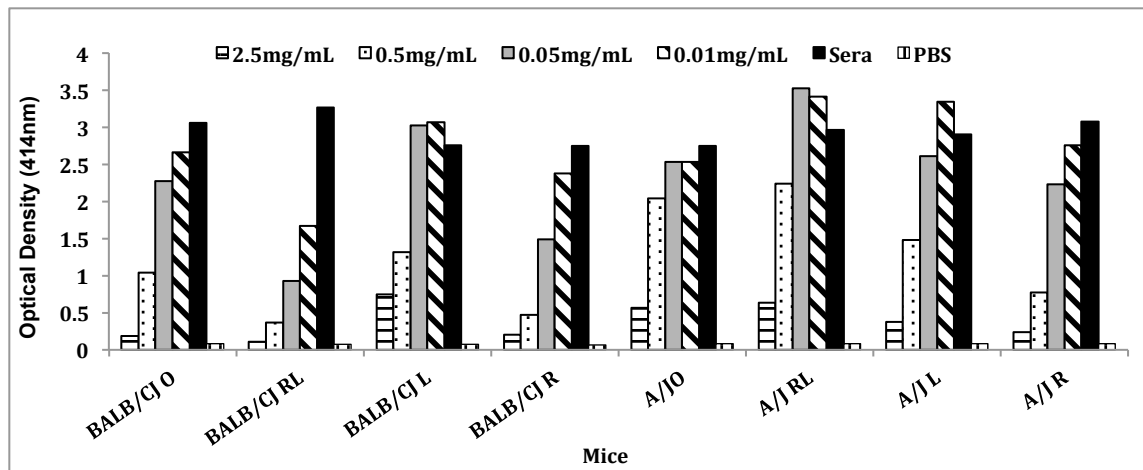

### Supplemental Figure D. Lack of Reactivity of Sera with M<sub>1</sub>dG

The reactivity of diluted sera (1:5000) with M<sub>1</sub>dG was analyzed using competitive ELISA analysis. Optical density readings were taken 15 and 30 minutes after adding ABTS substrate and averaged. Sera and antigen were co-incubated with multiple concentrations of non-BSA bound M<sub>1</sub>dG or sera as indicated for 60 minutes.

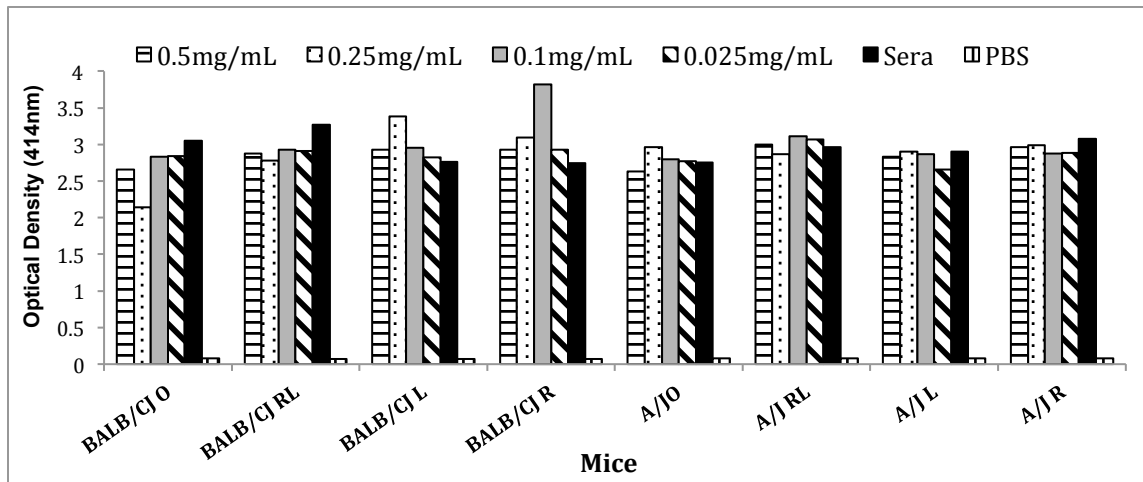

### Supplemental Figure E. Specificity of Sera Antigens for 6-oxo-M<sub>1</sub>dG

The reactivity of 6C9 hybridoma subclone (6C9BA4) supernatants were analyzed using competitive ELISA analysis. Xanthine and non-BSA bound 6-oxo-M<sub>1</sub>dG were examined and bars represent the level of antigen recognition as indicated by optical density readings.

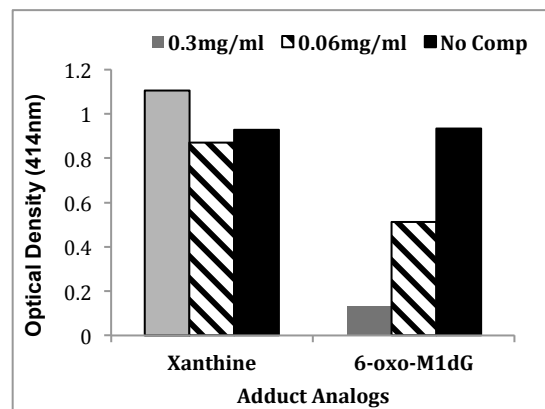

### Supplemental Figure F. Limit of Detection and Linearity of the LC-MS/MS system.

The LC-MS/MS chromatogram (top) shows a 20  $\mu\text{L}$  injection of a 0.50 nM solution of 6-oxo-M<sub>1</sub>dG on the described LC-MS/MS system. This results in 10 fmol of 6-oxo-M<sub>1</sub>dG on-column. The graph (bottom) is a plot of response (6-oxo-M<sub>1</sub>dG peak area  $\div$  [<sup>15</sup>N<sub>5</sub>]-6-oxo-M<sub>1</sub>dG peak area) versus 6-oxo-M<sub>1</sub>dG concentration. The 6-oxo-M<sub>1</sub>dG concentration ranged from 1.0 to 5,000 nM and [<sup>15</sup>N<sub>5</sub>]-6-oxo-M<sub>1</sub>dG was present in all solutions at 10 nM.

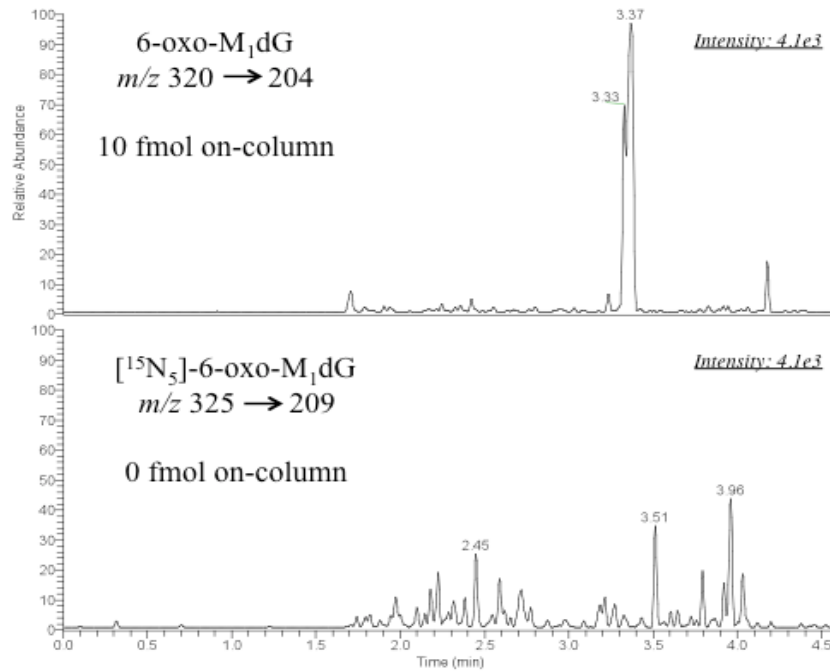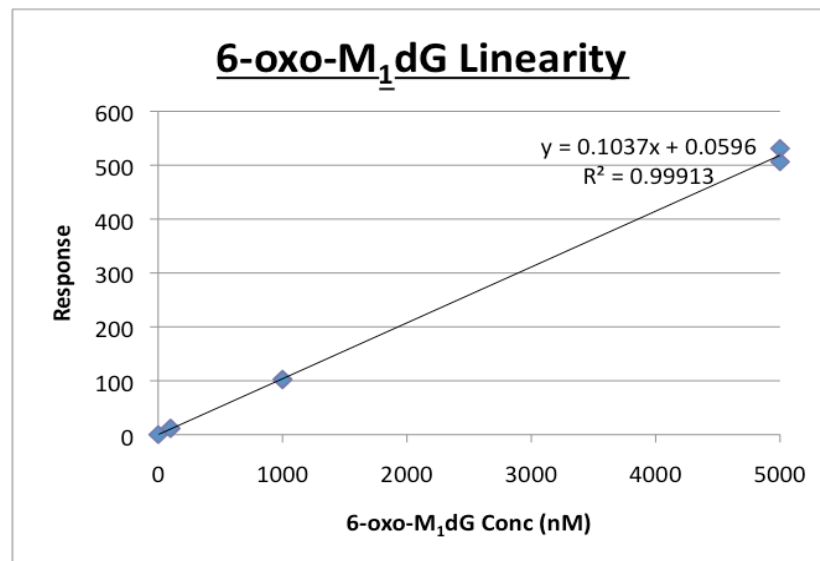

Supplement: tx200494h_si_001.pdf [file tx200494h_si_001.pdf]
